# Supplementary material
Source: publisher figshare collection journal article supplement (https://plos.figshare.com/articles/dataset/_/6167429)
Supplement: Supplementary file 1 [file 1]

Archive with 12 entries (12 files):
- ppat.1007010.s001.pdf
- ppat.1007010.s002.pdf
- ppat.1007010.s003.pdf
- ppat.1007010.s004.pdf
- ppat.1007010.s005.pdf
- ppat.1007010.s006.pdf
- ppat.1007010.s007.pdf
- ppat.1007010.s008.pdf
- ppat.1007010.s009.pdf
- ppat.1007010.s010.pdf
- ppat.1007010.s011.pdf
- ppat.1007010.s012.pdf
