# Supplementary material
Source: publisher figshare collection journal article supplement (https://plos.figshare.com/articles/dataset/_/6167429)
Supplement: Supplementary file 1 [file 1 › ppat.1007010.s002.pdf]

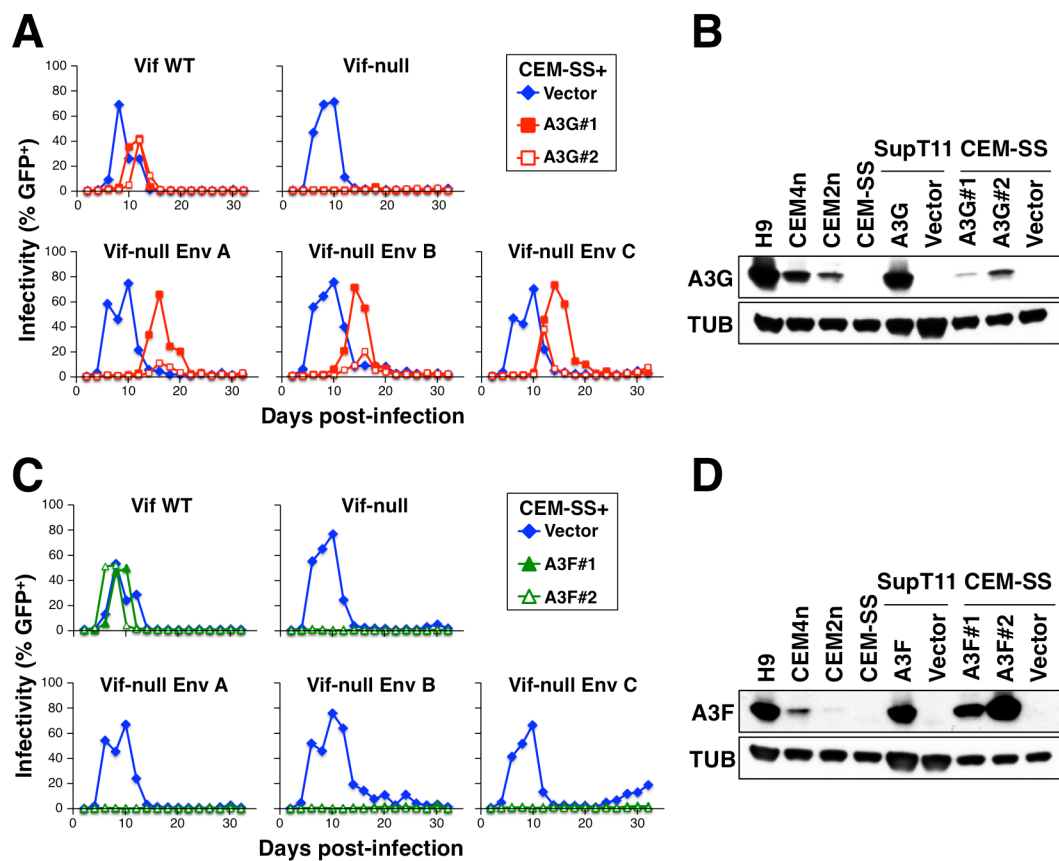

**S2 Fig. Spreading infection phenotypes of Vif-null Env variant molecular clones.** (A) Representative spreading infection assays in CEM-SS stably expressing a vector control or A3G (2 independent clones). (B) Immunoblots of A3G and TUB in the indicated cell lines. (C) Representative spreading infection assays in CEM-SS stably expressing a vector control or A3F (2 independent clones). (D) Immunoblots of A3F and TUB in the indicated cell lines.
