# Supplementary material
Source: publisher figshare collection journal article supplement (https://plos.figshare.com/articles/dataset/_/6167429)
Supplement: Supplementary file 1 [file 1 › ppat.1007010.s003.pdf]

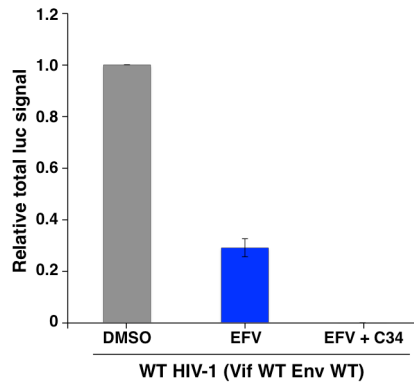

**S3 Fig. EFV-resistant luciferase signal is completely eliminated by fusion inhibitor peptide C34.** Total luminescence signals of Vif-proficient, WT Env virus treated with DMSO, EFV or EFV plus C34. Each signal is normalized to Gag expression, and reported as relative to the DMSO treatment. The fusion-dependent signal (EFV) falls to background level (mean;  $<1 \times 10^{-4}$ ) by the additional C34 treatment. Each histogram bar represents the mean  $\pm$  SEM of 4 biologically independent experiments.
