# Supplementary material
Source: publisher figshare collection journal article supplement (https://plos.figshare.com/articles/dataset/_/6167429)
Supplement: Supplementary file 1 [file 1 › ppat.1007010.s005.pdf]

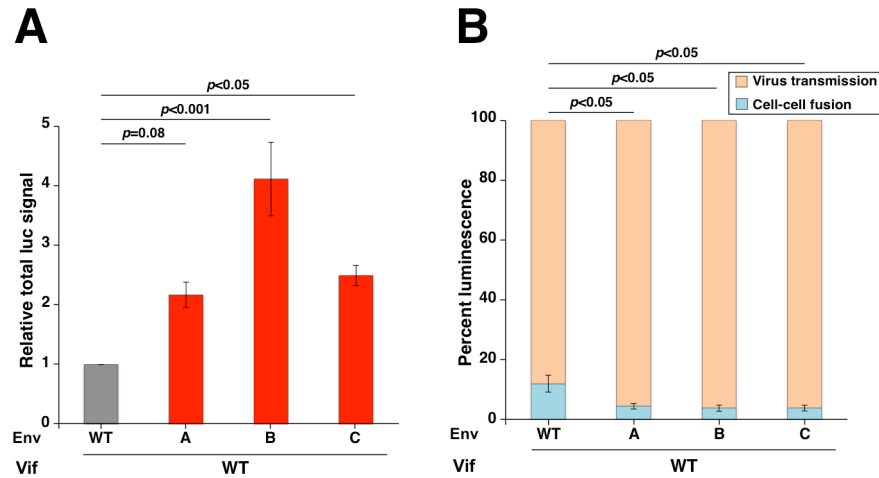

**S5 Fig. Env mutations also reduce syncytium formation in the Vif-proficient context.** (A) Total luminescence normalized to Gag expression and reported relative to the Vif-proficient virus. Each histogram bar represents the mean  $\pm$  SEM of the normalized data from 3 biologically independent experiments ( $p$ -values above each panel from one-way ANOVA and Fisher's LSD test). (B) Luminescence signal attributable to cell-cell fusion or virus transmission for the indicated viruses. Cell-cell fusion events are quantified as the fraction of total luciferase signal that is resistant to EFV-treatment, and virus transmission events are quantified by subtracting the cell-cell fusion signal from the total luminescence signal. Each histogram bar represents the mean  $\pm$  SEM of 3 biologically independent experiments ( $p$ -values above each panel from one-way ANOVA and Fisher's LSD test).
