# Supplementary material
Source: publisher figshare collection journal article supplement (https://plos.figshare.com/articles/dataset/_/6167429)
Supplement: Supplementary file 1 [file 1 › ppat.1007010.s006.pdf]

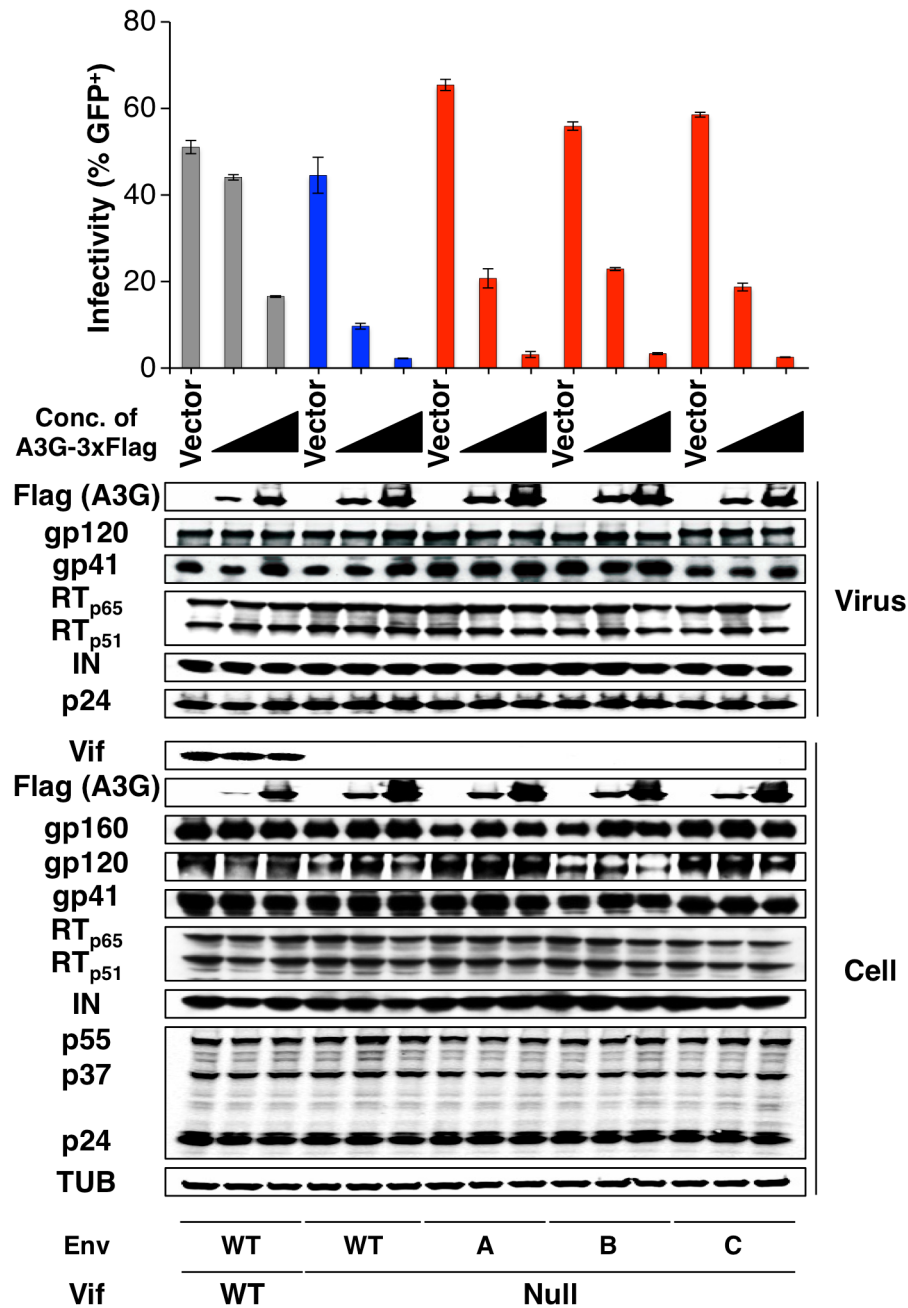

**S6 Fig. Env adaptations do not confer resistance to A3G in adherent 293T cells.** A representative single-cycle assay in 293T cells. The histogram reports mean  $\pm$  SD infectivity of 3 technically independent experiments. The immunoblots below show the indicated proteins in viral particles and cell extracts.
