# Supplementary material
Source: publisher figshare collection journal article supplement (https://plos.figshare.com/articles/dataset/_/6167429)
Supplement: Supplementary file 1 [file 1 › ppat.1007010.s007.pdf]

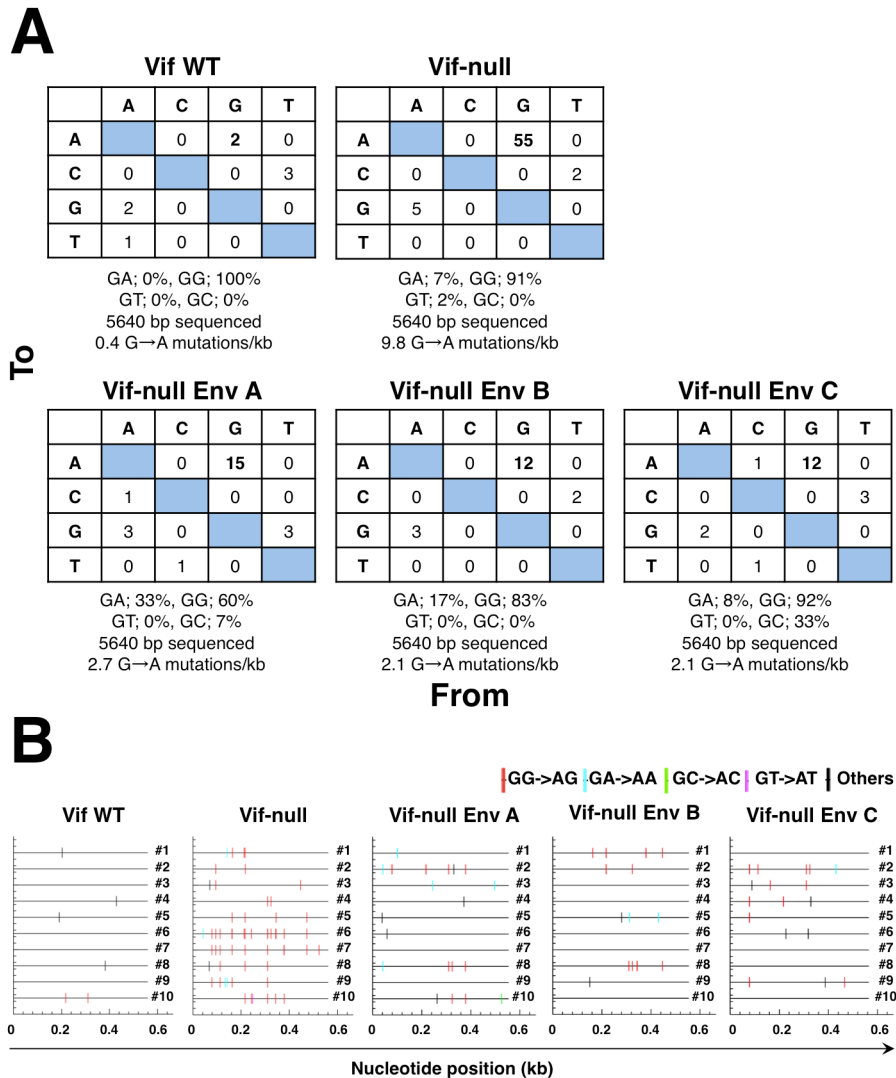

**S7 Fig. Env adaptations protect Vif-null HIV-1 from A3G mutagenesis.** (A) Representative viral mutation plots from 1 of 3 independent experiments. The indicated viruses were produced in SupT11-A3G cells and used to infect CEM-GFP cells, from which the *pol* region was amplified by high-fidelity PCR, cloned, and sequenced. (B) Actual distribution of G-to-A mutations in the indicated dinucleotide contexts in 10 independent 564 bp *pol* region DNA sequences from panel A.
