# Supplementary material
Source: publisher figshare collection journal article supplement (https://plos.figshare.com/articles/dataset/_/6167429)
Supplement: Supplementary file 1 [file 1 › ppat.1007010.s008.pdf]

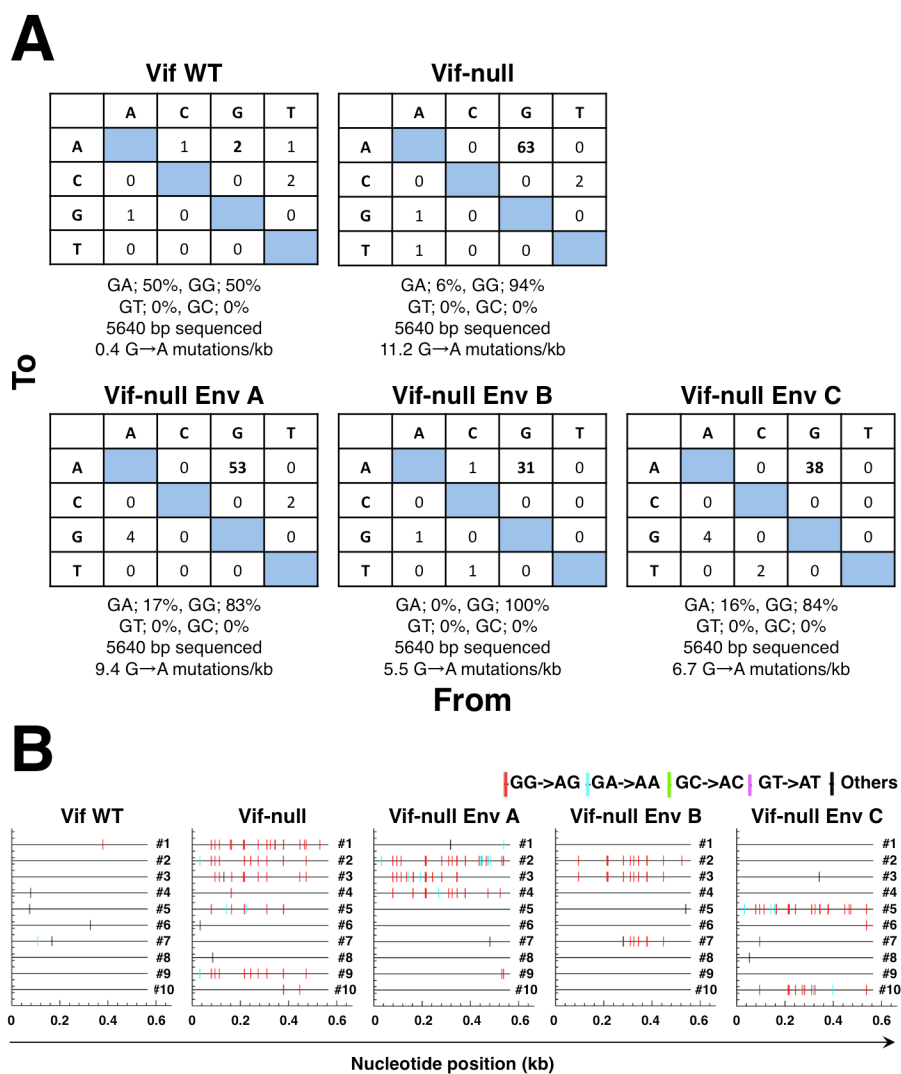

**S8 Fig. Endogenous reverse transcription data.** (A) Representative viral mutation plots from 1 of 4 independent ERT experiments. The *pol* region was amplified by high-fidelity PCR, cloned, and sequenced. (B) Actual distribution of G-to-A mutations in the indicated dinucleotide contexts in 10 independent 564 bp *pol* region DNA sequences from panel A.
