# Supplementary material
Source: publisher figshare collection journal article supplement (https://plos.figshare.com/articles/dataset/_/6167429)
Supplement: Supplementary file 1 [file 1 › ppat.1007010.s009.pdf]

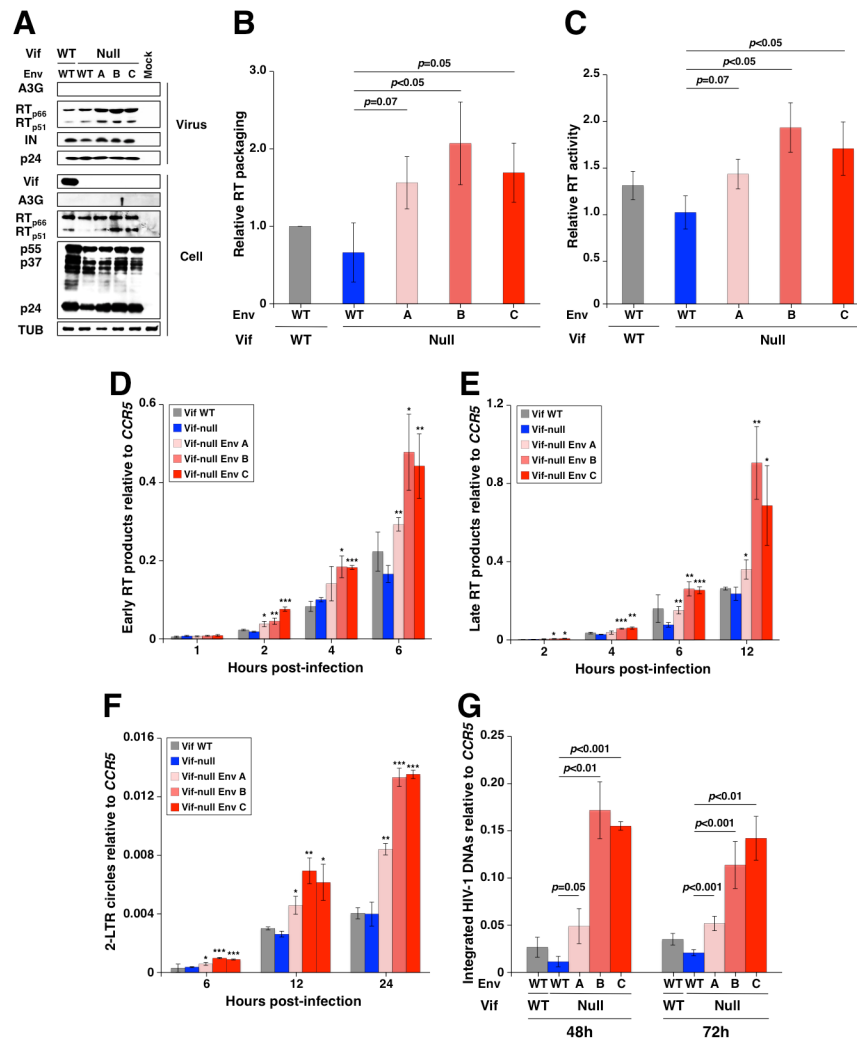

**S9 Fig. RT packaging and RT kinetics of Env variants produced in SupT11-vector cells.** (A) Immunoblots of the indicated proteins in viral particles and SupT11-vector producer cells from one representative experiment. (B) Relative RT packaging into viral particles produced in SupT11-vector cells. RT packaging levels were quantified based on band intensity and normalized by each p24 of the virions. Each data point is the average  $\pm$  SD of biological triplicates. (C) Relative RT activity in viral particles produced in SupT11-vector cells. RT activity in each viral lysate normalized for p24 contents was measured. Each data point is the average  $\pm$  SD of biological triplicates. (D-G) Kinetics of early RT, late RT, 2-LTR circle, and proviral DNA during infection of CEM-GFP cells using viruses originally produced in SupT11-vector cells (mean  $\pm$  SD of 3 biologically independent experiments). Statistical comparisons were done using Student's t test ( $p$ -values above each panel in comparison to Vif-null HIV-1; \*:  $p < 0.05$ , \*\*:  $p < 0.01$ , \*\*\*:  $p < 0.001$ ).
