# Supplementary material
Source: publisher figshare collection journal article supplement (https://plos.figshare.com/articles/dataset/_/6167429)
Supplement: Supplementary file 1 [file 1 › ppat.1007010.s010.pdf]

| <b>S1 Table. Summary of SupT11 spreading infection data.</b>                                                                                                                                                                                                                                                                                                                                                                                                                                                                  |                                          |                           |                 |
|-------------------------------------------------------------------------------------------------------------------------------------------------------------------------------------------------------------------------------------------------------------------------------------------------------------------------------------------------------------------------------------------------------------------------------------------------------------------------------------------------------------------------------|------------------------------------------|---------------------------|-----------------|
| HIV-1 IIIB molecular clone                                                                                                                                                                                                                                                                                                                                                                                                                                                                                                    | Day of peak (% GFP <sup>+</sup> at peak) |                           |                 |
|                                                                                                                                                                                                                                                                                                                                                                                                                                                                                                                               | Vector                                   | A3G                       | A3F             |
| Series 1 <sup>1</sup>                                                                                                                                                                                                                                                                                                                                                                                                                                                                                                         |                                          |                           |                 |
| Vif WT                                                                                                                                                                                                                                                                                                                                                                                                                                                                                                                        | 10±2 (48±9)                              | 12±2 (47±14)              | 14±3 (49±14)    |
| Vif-null                                                                                                                                                                                                                                                                                                                                                                                                                                                                                                                      | 12±2 (71±10) <sup>2</sup>                | NS <sup>5</sup>           | NS <sup>5</sup> |
| Vif-null Env A                                                                                                                                                                                                                                                                                                                                                                                                                                                                                                                | 7±1 (74±4) <sup>3</sup>                  | 15±1 (45±19) <sup>3</sup> | NS <sup>5</sup> |
| Vif-null Env B                                                                                                                                                                                                                                                                                                                                                                                                                                                                                                                | 7±1 (77±6) <sup>3</sup>                  | 12±1 (61±14) <sup>4</sup> | NS <sup>5</sup> |
| Vif-null Env C                                                                                                                                                                                                                                                                                                                                                                                                                                                                                                                | 7±1 (66±9) <sup>3</sup>                  | 14±1 (63±12) <sup>2</sup> | NS <sup>5</sup> |
| Series 2 <sup>6</sup>                                                                                                                                                                                                                                                                                                                                                                                                                                                                                                         |                                          |                           |                 |
| Vif WT                                                                                                                                                                                                                                                                                                                                                                                                                                                                                                                        | 8 (27)                                   | 12 (28)                   | 12 (35)         |
| Vif-null                                                                                                                                                                                                                                                                                                                                                                                                                                                                                                                      | 12 (54)                                  | NS <sup>5</sup>           | NS <sup>5</sup> |
| Vif-null gp120 A58V                                                                                                                                                                                                                                                                                                                                                                                                                                                                                                           | 8 (28)                                   | 12 (20)                   | NS <sup>2</sup> |
| Vif-null gp120 P79L/S143N                                                                                                                                                                                                                                                                                                                                                                                                                                                                                                     | 8 (67)                                   | 12 (24)                   | NS <sup>5</sup> |
| Vif-null gp120 M426L/Q442P                                                                                                                                                                                                                                                                                                                                                                                                                                                                                                    | 12 (29)                                  | NS <sup>5</sup>           | NS <sup>5</sup> |
| Vif-null gp41 T626M                                                                                                                                                                                                                                                                                                                                                                                                                                                                                                           | 8 (61)                                   | 20 (11)                   | NS <sup>5</sup> |
| Vif-null gp41 H643Y                                                                                                                                                                                                                                                                                                                                                                                                                                                                                                           | 12 (34)                                  | 20 (20)                   | NS <sup>5</sup> |
| Vif-null gp41 K655M                                                                                                                                                                                                                                                                                                                                                                                                                                                                                                           | 8 (72)                                   | 16 (46)                   | NS <sup>5</sup> |
| Vif-null gp41 M687I                                                                                                                                                                                                                                                                                                                                                                                                                                                                                                           | 12 (55)                                  | 24 (17) <sup>7</sup>      | NS <sup>5</sup> |
| Vif-null gp41 V822I                                                                                                                                                                                                                                                                                                                                                                                                                                                                                                           | 8 (65)                                   | 28 (13) <sup>7</sup>      | NS <sup>5</sup> |
| <sup>1</sup> Virus infectivity quantified every 2 days for >4 weeks (mean +/- SD of 14 biologically independent experiments).<br><sup>2</sup> $p < 0.01$ , <sup>3</sup> $p < 0.001$ , <sup>4</sup> $p > 0.05$ . Student's t-test comparisons with Vif WT day of peak data.<br><sup>5</sup> No significant virus replication (<5% GFP <sup>+</sup> ).<br><sup>6</sup> Virus infectivity from one representative experiment quantified every 4 days for >4 weeks.<br><sup>7</sup> Variable day of peak and % GFP <sup>+</sup> . |                                          |                           |                 |
