# Supplementary material
Source: publisher figshare collection journal article supplement (https://plos.figshare.com/articles/dataset/_/6167429)
Supplement: Supplementary file 1 [file 1 › ppat.1007010.s011.pdf]

| S2 Table. Summary of CEM-SS spreading infection data. |                                                |                           |                          |
|-------------------------------------------------------|------------------------------------------------|---------------------------|--------------------------|
| HIV-1 IIIB<br>molecular clone                         | Day of peak (% GFP <sup>+</sup> ) <sup>1</sup> |                           |                          |
| Series 1                                              |                                                |                           |                          |
|                                                       | Vector                                         | A3G#1                     | A3G#2                    |
| Vif WT                                                | 8±0 (51±11)                                    | 12±1 (47±7)               | 12±0 (48±12)             |
| Vif-null                                              | 9±1 (66±9) <sup>2</sup>                        | NS <sup>5</sup>           | NS <sup>5</sup>          |
| Vif-null Env A                                        | 9±1 (68±4) <sup>2</sup>                        | 16±0 (62±2) <sup>3</sup>  | 17±1 (9±2) <sup>3</sup>  |
| Vif-null Env B                                        | 9±1 (72±5) <sup>2</sup>                        | 14±1 (66±13) <sup>4</sup> | 16±1 (16±4) <sup>3</sup> |
| Vif-null Env C                                        | 9±1 (67±2) <sup>2</sup>                        | 13±1 (72±4) <sup>2</sup>  | 12±0 (29±5) <sup>2</sup> |
| Series 2                                              |                                                |                           |                          |
|                                                       | Vector                                         | A3F#1                     | A3F#2                    |
| Vif WT                                                | 8±0 (45±15)                                    | 9±1 (46±4)                | 8±0 (41±14)              |
| Vif-null                                              | 9±1 (73±3) <sup>2</sup>                        | NS <sup>5</sup>           | NS <sup>5</sup>          |
| Vif-null Env A                                        | 9±1 (67±7) <sup>2</sup>                        | NS <sup>5</sup>           | NS <sup>5</sup>          |
| Vif-null Env B                                        | 9±1 (73±2) <sup>2</sup>                        | NS <sup>5</sup>           | NS <sup>5</sup>          |
| Vif-null Env C                                        | 9±1 (64±4) <sup>2</sup>                        | NS <sup>5</sup>           | NS <sup>5</sup>          |

<sup>1</sup>Virus infectivity quantified every 2 days for >4 weeks (mean +/- SD of 4 biologically independent experiments).

<sup>2</sup>*p*>0.05, <sup>3</sup>*p*<0.001, <sup>4</sup>*p*<0.05. Student's t-test comparisons with Vif WT day of peak data.

<sup>5</sup>No significant virus replication (<5% GFP<sup>+</sup>).
