# Supplementary material
Source: publisher figshare collection journal article supplement (https://plos.figshare.com/articles/dataset/_/6167429)
Supplement: Supplementary file 1 [file 1 › ppat.1007010.s012.pdf]

**S3 Table. Oligonucleotide sequences**

| Name    | Sequences (5' to 3')                                        |
|---------|-------------------------------------------------------------|
| RSH1431 | GAA GCT TGC TCG GCT CTT AG                                  |
| RSH1432 | AAG ACA AGG ACC AAA GGA ACC                                 |
| RSH1433 | GGA TTT TCA GGC CCA ATT TT                                  |
| RSH1434 | TGG ATG GCC CAA AAG TTA AA                                  |
| RSH1435 | CAT GCT TCC CAT GTT TCC TT                                  |
| RSH1440 | GAT ACT TGG GCA GGA GTG GA                                  |
| RSH1441 | TAT GGG AAT TGG CTC AAA GG                                  |
| RSH1442 | GCA TAA GAG GTA AGG TGC AGA AA                              |
| RSH1443 | CCT CAA TAG CCC TCA GCA AA                                  |
| RSH1444 | GAC GGT ACA GGC CAG ACA AT                                  |
| RSH1445 | GGG AGT GAA TTA GCC CTT CC                                  |
| RSH1451 | CAA GGC CAA TGG ACA TAT CA                                  |
| RSH1452 | TTT GCT GGT CCT TTC CAA AC                                  |
| RSH1454 | CAA ACT TGG CAA TGA AAG CA                                  |
| RSH1649 | GGA CAG ATA GGG TTA TAG AA                                  |
| RSH2456 | GGT CTC TCT GGT TAG ACC AG                                  |
| RSH4068 | GAA TTA GTT GGT CAT TTT ACT AAT CTT TTC CAT GTG TTA ATC CTC |
| RSH4069 | GGA AAA GAT TAG TAA AAT GAC CAA CTA ATT CAT CTG CAC TAT TTT |
| RSH4196 | TCC ART ATT TRC CAT AAA RAA AAA                             |
| RSH4197 | TTY AGA TTT TTA AAT GGY TYT TGA                             |
| RSH4205 | AAT ATT CCA RTR TAR CAT RAC AAA AAT                         |
| RSH4206 | AAT GGY TYT TGA TAA ATT TGA TAT GT                          |
| RSH7418 | CTG GTC TAA CCA GAG AGA CC                                  |
| RSH7808 | GTC GAC ATA GCA GAA TAG GCG TT                              |
| RSH7809 | CAT ATG CTT TAG CAT CTG ATG CA                              |
| RSH7813 | CAT ATG ATA CAG AGG TAC ATA ATG TTT GGG                     |
| RSH7814 | GCT AGCT ATC TGT TTT AAA GTG GCA                            |
| RSH7815 | CCC ACA GAC CTC AAC CCA CAA                                 |

|          |                                                        |
|----------|--------------------------------------------------------|
| RSH7816  | TTG TGG GTT GAG GTC TGT GGG                            |
| RSH7817  | GCT AGC AAA TTA AGA GAA CAA TTT GG                     |
| RSH7818  | GGA TCC GTT CAC TAA TCG AAT GG                         |
| RSH7819  | AAA ATT ATT CAT AAT AAT AGT AGG AGG CTT G              |
| RSH7820  | CAA GCC TCC TAC TAT TAT TAT GAA TAA TTT T              |
| RSH8373  | NNN NNG ATA TCA CCA TGA AGC CTC ACT TCA GAA ACA CAG TG |
| RSH8374  | NGC GGC CGC CCG TTT TCC TGA TTC TGG AGA ATG GCC CG     |
| RSH8086  | GGA TCC TTA GCA CTT ATC TGG GA                         |
| RSH8087  | CTC GAG ATG CTG CTC CCA C                              |
| RSH8088  | CAG CTA TAG CAA TAG CTG AGG GG                         |
| RSH8089  | CCC CTC AGC TAT TGC TAT AGC TG                         |
| RSH9972  | GCC TCA ATA AAG CTT GCC TTG A                          |
| RSH9973  | TGA CTA AAA GGG TCT GAG GGA TCT                        |
| RSH9974  | FAM-AGA GTC ACA CAA CAG ACG GGC ACA CAC TA-TAMRA       |
| RSH9975  | TGT GTG CCC GTC TGT TGT GT                             |
| RSH9976  | GAG TCC TGC GTC GAG AGA GC                             |
| RSH9977  | FAM-CAG TGG CGC CCG AAC AGG GA-TAMRA                   |
| RSH9978  | AAC TAG GGA ACC CAC TGC TTA AG                         |
| RSH9979  | TCC ACA GAT CAA GGA TAT CTT GTC                        |
| RSH9980  | FAM-ACA CTA CTT GAA GCA CTC AAG GCA AGC TTT-TAMRA      |
| RSH9981  | TGC TGG GAT TAC AGG CGT GAG                            |
| RSH9982  | CCA GAA GAG CTG AGA CAT CCG                            |
| RSH9983  | GCC AAG CAG CTG AGA GGT TAC T                          |
| RSH9984  | FAM-TCC CCT ACA AGA AAC TCT CCC CGG-TAMRA              |
| RSH10734 | FAM-AAA TAT CCC AAA GAG AGA-TAMRA                      |
